# Supplementary material
Source: PubMed Central journal article supplement (PMC1568936)

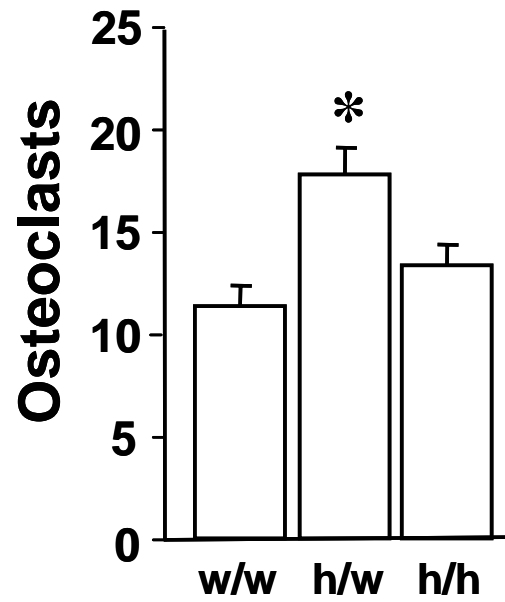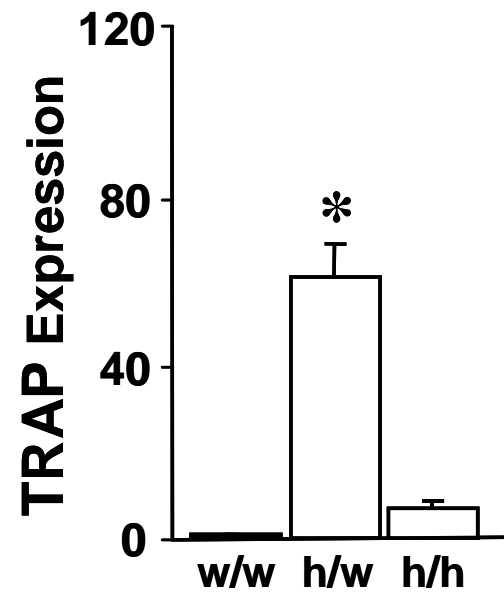

Supplement: pnas_0600427103_1.pdf [file pnas_0600427103_1.pdf]
